# Supplementary material
Source: ML conference proceedings conference paper supplement (https://openreview.net/forum?id=f1qn9uZ-t55)
Supplement: supplementary_material [file attachment]

**UpDn****Question:** What color is the mouse pad? **GT: blue**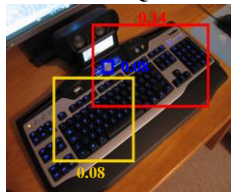

|        |      |
|--------|------|
| gray   | 0.05 |
| silver | 0.05 |
| blue   | 0.08 |
| black  | 0.78 |

**LRLGC**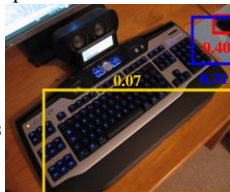

|       |      |
|-------|------|
| gray  | 0.01 |
| brown | 0.03 |
| blue  | 0.85 |
| black | 0.08 |

**Question:** How many planes are there? **GT: 1**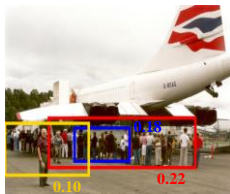

|   |      |
|---|------|
| 3 | 0.17 |
| 4 | 0.19 |
| 8 | 0.21 |
| 9 | 0.24 |

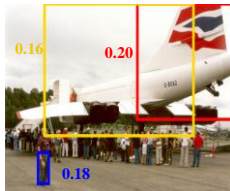

|   |      |
|---|------|
| 4 | 0.05 |
| 3 | 0.19 |
| 2 | 0.33 |
| 1 | 0.39 |

**Question:** Does this horse have a saddle on it's back? **GT: no**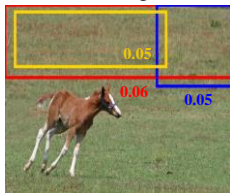

|     |      |
|-----|------|
| 2   | 0.00 |
| 0   | 0.00 |
| no  | 0.48 |
| yes | 0.51 |

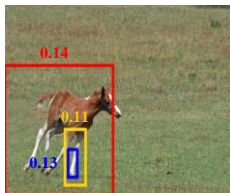

|     |      |
|-----|------|
| 1   | 0.00 |
| 2   | 0.00 |
| yes | 0.01 |
| no  | 0.97 |
