# Supplementary material
Source: ML conference proceedings conference paper supplement (https://openreview.net/forum?id=f1qn9uZ-t55)

**Question:** What color is the sky?

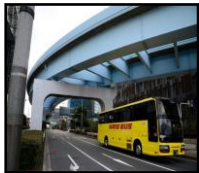

**GT:** white  
**Pred:** white

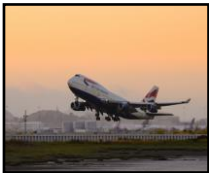

**GT:** red  
**Pred:** white

**Question:** What color is the grass?

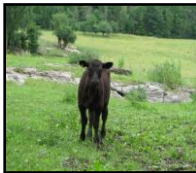

**GT:** green  
**Pred:** green

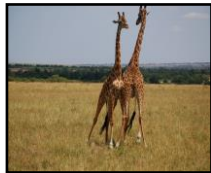

**GT:** brown  
**Pred:** green

(A)

**Q:** What color is the grass?

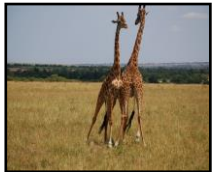

**GT:** brown

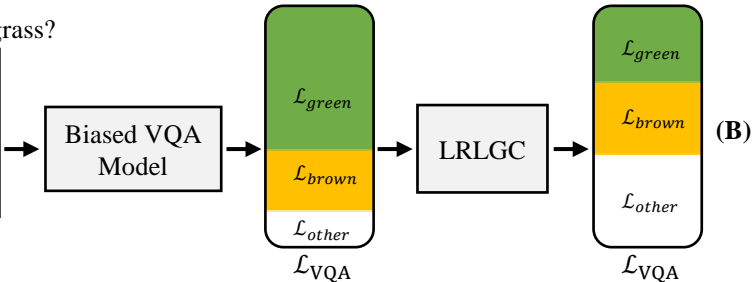

Supplement: supplementary_material [file attachment]
