# Supplementary material
Source: ML conference proceedings conference paper supplement (https://openreview.net/forum?id=f1qn9uZ-t55)

## Training

- $\odot$  Element-wise Product
- $\otimes$  Matrix Multiplication
- Fully Connected layer
- $\parallel$  No Backpropagation
- $\oplus$  Element-wise Add

## Evaluation

$Q_i$  What color is the grass?

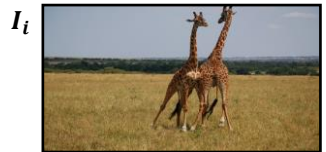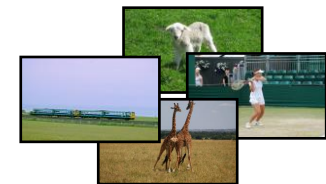

Image Set

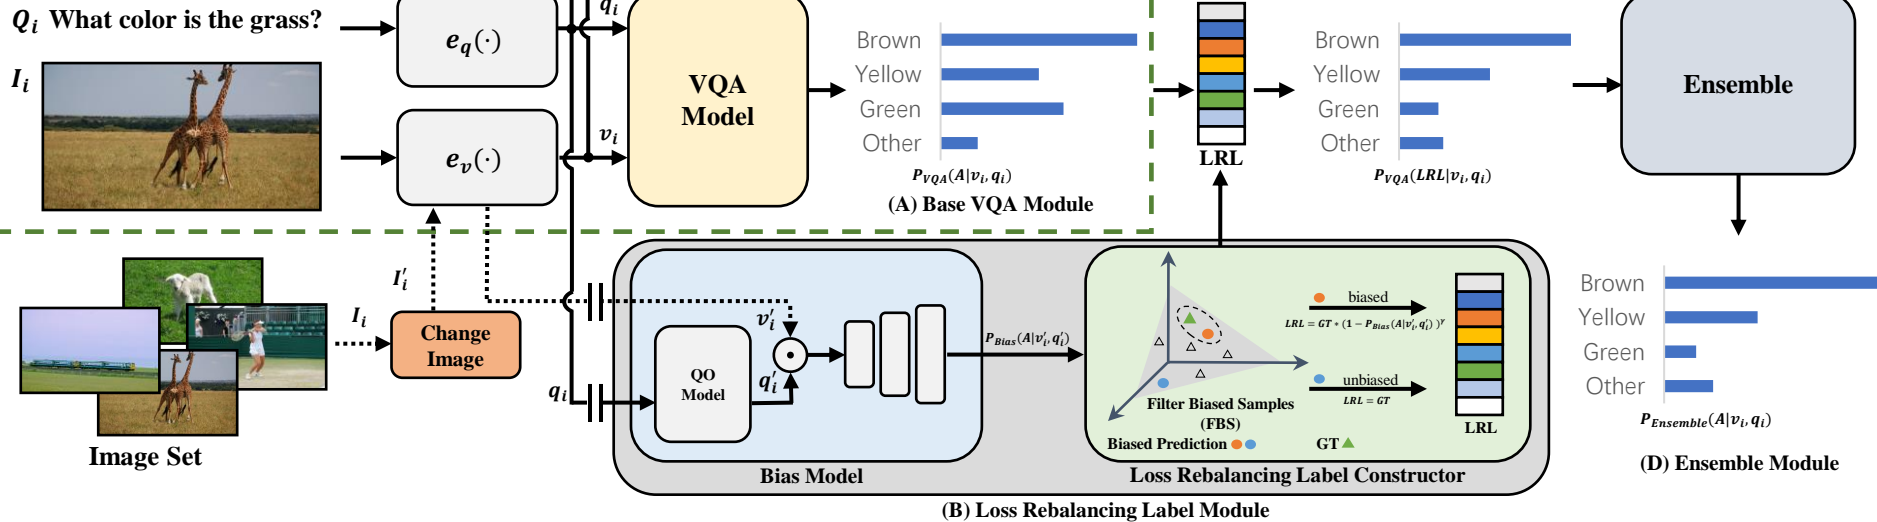

Supplement: supplementary_material [file attachment]
